# Supplementary material
Source: Frontiers journal article supplement (https://www.frontiersin.org/articles/456136)
Supplement: Data_Sheet_1.PDF [file Data_Sheet_1.PDF]

# Appendix

## A. Videos

Below the links of the videos - they have been edited in order to make them shorter.

Video 1: <https://youtu.be/w5sIJhSWw5o>

Video 2: <https://youtu.be/NGsoqGoUONg>

## B. General questions - bold questions are verifiable truth

Robot

- 1. What is the name of Berlusconi ?**
2. Could you describe me what do you usually eat at your home for christmas ?
- 3. Is it possible for a person to get burnt while using an oven ?**
4. Can you tell me briefly what did you do last week-end ?
5. Can you describe what did you eat for breakfast this morning ?
- 6. In which city is located the Coliseum ?**
7. What are the ingredients of your favorite dish ?
8. Could you describe me briefly the place where you live ?
- 9. What is the name of the chief town of Liguria region ?**
- 10. Is Italy in Europe ?**

Human

1. What is the name of your mother?
2. When did you graduated?
3. What do you do during a typical day ?
- 4. Can an oven be hot?**
5. What did you do last new year eve ?
6. Which country would like to visit and why ?
7. Can you tell me what do you like to do during your free time ?
8. How do you cook pasta ?
- 9. Is the Coliseum located in Bari?**
- 10. What language is spoken in the USA?**

## B. Video 1, 2 questions - bold questions are short type

Video 1 - Robot questions

- 1. Were there two or three people ?**
2. Describe me the criminal act ?
- 3. Does the suspects look each other before to commit the criminal act ?**
- 4. What is the age of the implicated ?**
- 5. Describe me the behaviors of the suspects ?**
- 6. Can you describe me the place where the robbery took place ?**
- 7. Was there any violent acts committed ?**
8. Describe me the aspect of the suspects ?
9. How the suspects were dressed ?
- 10. How many persons were present during the robbery ?**

#### Video 1 - Human questions

- 1. Was there a woman?**
2. How did they hide loot?
- 3. Was it crowded ?**
4. Describe me how the suspects communicate between each other ?
- 5. Did they interact with someone ?**
6. Describe me what they steal ?
- 7. Was someone else in the shop ?**
- 8. Did they wear summer clothes ?**
9. Which clothes did they wear ?
10. Did they have any particular aspect?

#### Video 2 - Robot questions

- 1. Was the criminal male ?**
2. Describe me the criminal act ?
- 3. Was the person of color ?**
4. Describe me what the criminal was wearing ?
- 5. How many people were present apart from the criminal ?**
6. Tell me where did it happen ?
- 7. Was the criminal violent ?**
- 8. What was approximately the age of the criminal ?**
9. Describe me the physical aspect of the suspect ?
10. How did the criminal hide the loot ?

#### Video 2 - Human questions

- 1. Was the criminal female ?**
- 2. How many people were in the shop during the robbery ?**
3. Describe me the behavior of the suspect ?
4. Describe me the merchandise sell in the shop ?
- 5. Did the criminal had associate ?**
6. Describe me what was robbed ?
- 7. Did the criminal have a backpack ?**
8. Tell me what the other persons were doing during the robbery ?
9. Was the criminal wearing sporty Clothes ?
- 10. Describe me particular signs of the criminal ?**
